# Supplementary material
Source: publisher site journal article supplement (https://www.dovepress.com/article/439359)
Supplement: Supplementary file 1 [file get_supplementary_file.php]

**Supporting Information**

**SI Figure 1:** Characterization of ACE loaded nanostructured lipid carriers conjugated with chemical enhancers (ACE-NLCs+CE) and MTX loaded lipid-polymer hybrid nanoparticles (MTX-LPHNPs) A) Determination of the micro-emulsion (ME) region by drawing the pseudoternary phase diagram using the titration methods B) confirmation of the state (crystalline vs. amorphous) of ACE or MTX before and after the encapsulation process by the X-ray diffractometry (X-RD) of MTX loaded LPHNPs (a), and ACE loaded NLC (b)

**SI Figure 2:** *In vitro* release patterns of A) ACE and MTX loaded NLCs/CE and B) LPHNPs showing the percentage of drug release pattern of the ACE and MTX. A comparative analysis was made to compare our nanoformulations to those with the market formulation of A) Gel-(ACE-MKT) and B) MTX-MKT formulations (n=3 independent experiments).

**SI Figure 3:** Texture profile analysis (TPA) & rheology behavior (a, b, c) of developed NLC-gel formulation (Gel-(ACE-NLC+CE) showed pseudoplastic flow resulting from a colloidal network with respect to (d) spreadability, gel strength, force of extrusion of the developed formulation.

**Aa**

**Ab**

**Ac**

**Ad**

**Ba**

**Bb**

**Bc**

**Bd**

**SI Figure 4:** The molecular docking analysis of 3D and 2D representation of the interaction profile of A) ACE and B) MTX. ACE interacts with Aa) NF-kBp50 Ab) IL-10 Ac) Bim Ad) IL-6. Similarly, MTX interacts with Ba) NF-kBp50 Bb) IL-10 Bc) Bim Bd) IL-6

**Aa**

**Ab**

**Ac**

**Ad**

**Ba**

**Bb**

**Bc**

**Bd**

**SI Figure 5:** The mocking analysis of 3D and 2D representation of the interaction profile of A) ACE and B) MTX. ACE interacts with Aa) CD40 Ab) IL-1β Ac) IFN-γ Ad) IL-17. Similarly, MTX interacts with Ba) CD40 Bb) IL-1β Bc) IFN-γ Bd) IL-17

**Aa**

**Ab**

**Ac**

**Ad**

**Ba**

**Bb**

**Bc**

**Bd**

**SI Figure 6:** The mocking analysis of 3D and 2D representation of the interaction profile of A) ACE and B) MTX. ACE interacts with Aa) TGF-β Ab) Caspase-8 Ac) MMP-1 Ad) Caspase-3. Similarly, MTX interacts Ba) TGF-β Bb) Caspase-8 Bc) MMP-1 Bd) Caspase-3

**Aa**

**Ab**

**Ac**

**Ad**

**Ba**

**Bb**

**Bc**

**Bd**

**SI Figure 7:** The mocking analysis of 3D and 2D representation of the interaction profile of A) ACE and B) MTX. ACE interacts with Aa) pAKT1 Ab) Cox-2 Ac) TNF-α Ad) AKT1. Similarly, MTX interacts with Ba) pAKT1 Bb) Cox-2 Bc) TNF-α Bd) AKT1

**SI Figure 8:** The fold change (FR) regulation of relative mRNA expression (A-I) of inflammatory (IL-1β, IL-6, IL-8, TNF-α, iNOS, Cox-2), immunoregulatory (IL-10, IDO-1) and join damage (MMP-1) markers was assessed in the LPS stimulated macrophage model of inflammation receiving treatment with the mono (ACE, MTX) their combination (ACE and MTX) drug regimen. Data are expressed as mean ± SD and significant differences are shown as p-value (p<0.05); *<0.01, **<0.001 and *** <0.0001.

**SI Figure 9**: The *in vitro* transcript expression of immune markers A) (NF-kBp50, IL-1β, IL-6, IL-8, IL-10, TNF-α, iNOS, MMP-1, Cox-2) in the LPS (1 µg/ml) stimulated macrophages B) Transcripts regulation observations were validated by the immunoblot analysis in the MMI. The stimulated cells were lysed and all proteins were detected on immunoblot, and β-actin served as a loading control. The data represent three independent experiments (n = 3), C) Nitric oxide (NO) production was determined by measuring nitrite content in the LPS stimulated macrophages. Duplicates of 50 μl of culture media were added to 96-well microtiter plates and mixed with 50 µl of modified Griess reagent. The plates were read at 550 nm and standard curve with increasing concentrations of sodium nitrite drawn in parallel and NO was estimated. Data are expressed as mean ± SD and significant differences are shown as p-value (*** <0.0001 highly significant).

**SI Figure 10:** Quantitative analysis of the Bim expression determined by estimating the mean fluorescence intensity (MFI) using the image J software. Statistical data is expressed as mean ± SE (n = 3). (**p*< 0.01; significant))

**SI Figure 11**: The histopathology of the sections made from the bone A) and joints B) of paw to confirm the therapeutic efficacy of “Mono” and “combination” therapy regimen. The market formulations treated experimental Wistar rats exhibited lesser reduction in the inflammation and a mild inhibition in the infiltration of inflammatory cells A) (left column). On the contrary, our formulations when administered as the combination therapy showed the greater reduction in the inflammation and significant inhibition of the infiltrating inflammatory cells A) (right panel). Same applies to the paw joints B) Combination drug therapy mediated by the nanoscale drug carrier formulations modulating the disease severity for regaining the paw structure similar to those with the untouched control. The degree of severity is presented as 0=normal; + = equivocal; ++ = mild; and ++++ = severe. (Scale bar: 50 μm)

CIA: CFA induced arthritis, MTX-LPHNPs (i.v.): Intravenous injection, Gel-(ACE-NLCs+CE) t.d: Transdermal application, Combination drug therapy: MTX-LPHNPs (i.v.) and Gel-(ACE-NLCs+CE) t.d., Combination therapy (market formulations): Gel-ACE-MKT (t.d.) + MTX-MKT (s.c.), Control (untouched), Gel (ACE-MKT) (t.d.), MTX-MKT (s.c.)

**SI Figure 12:** Histopathology of the sections of bone A) and joints B) of ankle to confirm the therapeutic efficacy of “Mono” and “combination” therapy. The market formulations treated experimental Wistar rats showed the lesser reduction in the inflammation and mild inhibition of the infiltration of inflammatory cells A) (left column). On the contrary, our formulations when administered as the combination therapy showed the greater reduction in the inflammation and significant inhibition of the infiltrating inflammatory cells A) (right panel). Same applies to ankle joints B) Combination drug therapy mediated by the nanoscale drug carrier formulations modulates the disease severity to regain the ankle structure similar to the untouched control. The degree of severity is presented as 0=normal; + = equivocal; ++ = mild; +++ = moderate; and ++++ = severe. (Scale bar: 50 μm)

CIA: CFA induced arthritis, MTX-LPHNPs (i.v.): Intravenous injection, Gel-(ACE-NLCs+CE) t.d: Transdermal application, Combination drug therapy: MTX-LPHNPs (i.v.) and Gel-(ACE-NLCs+CE) t.d., Combination therapy (market formulations): Gel-ACE-MKT (t.d.) + MTX-MKT (s.c.), Control (untouched), Gel(ACE-MKT) (t.d.), MTX-MKT (s.c.)

**SI Figure 13:** Histopathological analysis of skin of bone (left panel) and ankle (right panel) to validate the therapeutic efficiency of drug treatment upon completion of “mono” and “combination” therapy schedule and compared to that with the market formulation in the experimental animals. The combination therapy using our nano-formulations showed the greater recovery from the RA pathology as a significant inhibition of infiltration of inflammatory cells in comparison to the market formulations injected as mono and combination drug therapy was seen. The combination drug therapy with the nanoformulations is shown to modulate the disease severity to regain the skin structure similar to the untreated control. The degree of severity is presented as 0=normal; + = equivocal; ++ = mild; +++ = moderate; and ++++ = severe. (Scale bar: 50 μm)

CIA: CFA induced arthritis, MTX-LPHNPs (i.v.): Intravenous injection, Gel-(ACE-NLCs+CE) t.d: Transdermal application, Combination drug therapy: MTX-LPHNPs (i.v.) and Gel-(ACE-NLCs+CE) t.d., Combination therapy (market formulations): Gel-ACE-MKT (t.d.) + MTX-MKT (s.c.), Control (untouched), Gel (ACE-MKT) (t.d.), MTX-MKT (s.c.)

**Table Information**

**SI Table 1: Solubility of aceclofenac in different oils, lipids, surfactants and co-surfactants**

| **Sr. No.** | **Solvents** | **mg/gm** |
| --- | --- | --- |
| **Solid Lipids** | | |
| 1 | Glyceryl monosterate | 145±11.96 |
| 2 | Cetyl alcohol | 205±13.26 |
| 3 | Capmul | 115±10.56 |
| 4 | Stearic acid | 155±12.48 |
| 5 | Cetylpalmitate | 145±13.57 |
| 6 | Compritol | 138±16.27 |
| **Lipid oils** | | |
| 1 | Transcutol P | 514±26.2 |
| 2 | Labrasol | 280±11.34 |
| 3 | Labrofac | 95.89±6.87 |
| 4 | IPM | 11.56±1.12 |
| 5 | Olive Oil | 2.68±0.12 |
| 6 | Ethyl Oleate | 6.21±0.27 |
| 7 | Olic Acid | 8.22±0.11 |
| **Surfactants** | | |
| 1 | Tween 20 | 153.22±9.76 |
| 2 | Tween 40 | 142.52±8.23 |
| 3 | Tween 80 | 147.95±5.67 |
| 4 | PEG 200 | 302.80±9.78 |
| 5 | PEG 300 | 276.82±6.98 |
| 6 | PEG 400 | 287.17±8.99 |
| 7 | Propylene Glycol | 21.77±1.1 |
| 8 | Terpineol | 84.26±3.6 |
| **Co-surfactants** | | |
| 1 | Ethanol | 83.69±6.87 |
| 3 | Ab ethanol | 56.85±3.76 |
| 4 | IPA | 34.67±2.98 |
| 5 | Methanol | 150±11.32 |
| 9 | Ethanol: Water | 150±8.34 |
| 10 | Methanol: Water | 130±9.57 |

**SI Table 2: Solubility of methotrexate in different solid lipids**

| **Sr. No.** | **Solvents** | **mg/gm** |
| --- | --- | --- |
| **Solid Lipids** | | |
| 1 | Glyceryl monosterate (GMS) | 106.87±7.96 |
| 2 | Stearic Acid (SA) | 165.73±12.26 |
| 3 | Cetyl alcohol | 80.45±6.26 |
| 4 | Capmul® MCM (C10) | 86.74±5.96 |
| 5 | Cetyl alcohol (CA) | 72.12±6.38 |
| 6 | Cetyl palmitate (CP) | 124.23±8.47 |
| 7 | Compritol® 888 ATO | 105.91±10.37 |
| 8 | Gelucire® 50/13 | 215.06±11.8.37 |
| Solubility of Methotrexate in Surfactants, co-surfactants and other solvents are mentioned in previously published manuscript.1 | | |

**SI Table 3: Characterization of lipid-polymer hybrid nanoparticles (LPHNP) formulations with respect to size, Polydispersity index, (PDI), zeta potential and entrapment efficiency (EE)**

| **Sr.**  **No.** | **Formulations** | **Zeta potential**  **(mV)** | **Particle size**  **(nm)** | **PDI** | **Entrapment**  **Efficiency**  **(%)** | **Drug loading**  **(%)** |
| --- | --- | --- | --- | --- | --- | --- |
| 1 | MTX-LPHNPs | -16.58±1.8 | 168.5±8.5 | 0.11 | 84.6 ±4.3 | 9.98±0.31 |
| 2 | LPHNPs | -13.76±1.1 | 151.5±7.5 | 0.12 | - |  |
| 3 | ACE-NLCs | -14.2±0.9 | 189.87±7.2 | 0.19 | 89.54±3.9 | 14.87±0.35 |
| 4 | NLCs | -11.35±1.3 | 162.5±5.2 | 0.21 | - | - |

**SI Table 4: Stability of methotrexate loaded LPHNPs (MTX-LPHNPs) and aceclofenac loaded NLCs (ACE-NLCs) following different storage conditions for over three months.**

| **Storage condition** | **Time** | **Particle size**  **(nm)** | **PDI** | **Zeta potential (mV)** | **Percentage of drug**  **(assay)** | **Percentage of drug**  **(assay)** |
| --- | --- | --- | --- | --- | --- | --- |
|  | **ACE-NLCs** | | | | | **Gel-(ACE-NLCs+CE)** |
|  | Initial | 189.87± 4.8 | 0.19± 0.02 | -14.2±0.9 | 96.5±4.7 | 98.3±5.8 |
| 2-8°C | After 3 months | 194.3± 4.3 | 0.26 ± 0.03 | -13.6±0.4 | 93.4±5.8 | 93.2±6.7 |
| 25±2°C/60±5% RH | 1758 ± 7.6 | 0.38± 0.02 | -12.2±0.7 | 91.2±6.7 | 89.8±7.8 |
| 40±2°C/75±5% RH | 173.1 ± 4.5 | 0.39 ± 0.01 | -13.2±0.5 | 87.6±4.5 | 82.7±6.3 |
| **MTX-LPHNPs** | | | | | | |
|  |  | **Particle size**  **(nm)** | **PDI** | **Zeta potential (mV)** | **Percentage of drug**  **(assay)** |  |
|  | Initial | 168.5 ± 4.9 | 0.11± 0.02 | -15.58 ± 0.7 | 97.76±2.8 |  |
| 2-8°C | After 3 months | 175.87 ± 4.8 | 0.22± 0.02 | -14.5±0.5 | 96.89± 4.8 |  |
| 25±2°C/60±5% RH | 156.87 ± 3.9 | 0.32± 0.02 | -13.8±0.6 | 92.98±4.7 |  |
| 40±2°C/75±5% RH | 148.56 ± 4.7 | 0.35± 0.02 | -13.7±0.8 | 88.5±5.9 |  |

**SI Table 5: Primer sequence of genes quantified by qRT-PCR**

| **Gene** | **Forward (5' - 3')** | **Reverse (5' - 3')** |
| --- | --- | --- |
| IL-1beta | GTGGCAATGAGGATGACTTGTTC | TAGTGGTGGTCGGAGATTCGTA |
| IL-6 | AGCCACTCACCTCTTCAGAAC | GCCTCTTTGCTGCTTTCACAC |
| IL-8 | CTGATTTCTGCAGCTCTGTG | GGGTGGAAAGGTTTGGAGTATG |
| IL-10 | GTGATGCCCCAAGCTGAGA | CACGGCCTTGCTCTTGTTTT |
| TNF-Alpha | CTGCTGCACTTTGGAGTGAT | AGATGATCTGACTGCCTGGG |
| iNOS | GGCTGGAAGCCCAAGTACG | CTCAGGGTCACGGCCATTG |
| COX-2 | CAGCACTTCACGCATCAGTT | CGCAGTTTACGCTGTCTAGC |
| NF-kBp50 | TGAGTCCTGCTCCTTCCA | GCTTCGGTGTAGCCCATT |
| GAPDH | TGCACCACCAACTGCTTAGC | GGCATGGACTGTGGTCATGAG |
| MMP-1 | GATGTGGAGTGCCTGATGTG | GAGCATCCCCTCCAATACCT |
| Caspase-3 | GAGCTTGGAACGGTACGCTA | CCGTACCAGAGCGAGATGAC |
| Caspase-8 | GAAAGCGAAGCAGCCTATGG | CGCTCCCCAGAACTGTACTC |
| Akt | TCTATGGCGCTGAGATTGTG | CTTAATGTGCCCGTCCTTGT |
| CD40 | CAGCCAGGACAGAAACTGGTGAGT | CTTCTTCACAGGTGCAGATGGTGTC |
| IDO | CAAAGGTCATGGAGATGTCC | CCACCAATAGAGAGACCAGG |
| TLR4 | AAGCCGAAAGGTGATTGTTG | CTGAGCAGGGTCTTCTCCAC |
| BIM | GGCCCCTACCTCCCTACA | GGGGTTTGTGTTGATTTGTCA |

**Reference**

1. Amarji B, Garg NK, Singh B, Katare OP. Microemulsions mediated effective delivery of methotrexate hydrogel: more than a tour de force in psoriasis therapeutics. *Journal of drug targeting.* 2016;24(2):147-160.
